# Supplementary material for: Preclinical evaluation of ELP‐004 in mice
Source: PubMed Central journal article supplement — Pharmacol Res Perspect. 2024 Jun 28;12(4):e1230. doi: 10.1002/prp2.1230 (PMC11212004; doi:10.1002/prp2.1230), 2024-06-28
Supplement: PRP2-12-e1230-s001.pdf [file PRP2-12-e1230-s001.pdf]

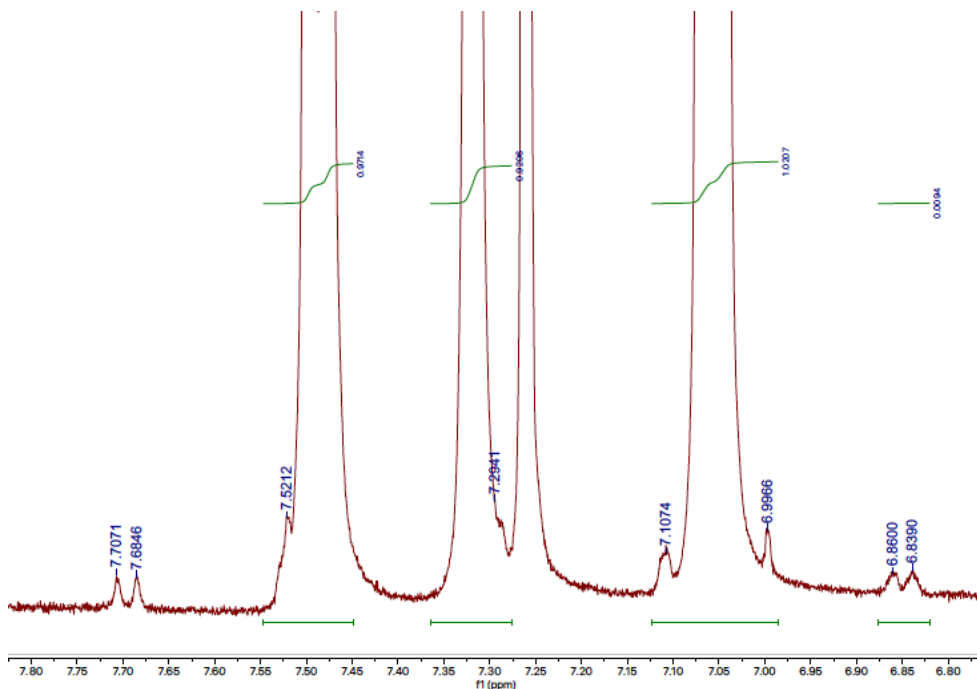

**Fig. S1.** Expanded aromatic region of the  $^1\text{H}$  NMR (400 MHz,  $\text{CDCl}_3$ ) of ELP-004 showing the chemical shifts of resonances belonging to protons attached to  $^{13}\text{C}$  atoms. The  $^{13}\text{C}$  resonances are observed at  $\sim 1\%$  making the sample  $>99\%$  pure since no impurity resonance can be observed in the spectrum.

A.

RT: 0.00 - 44.01

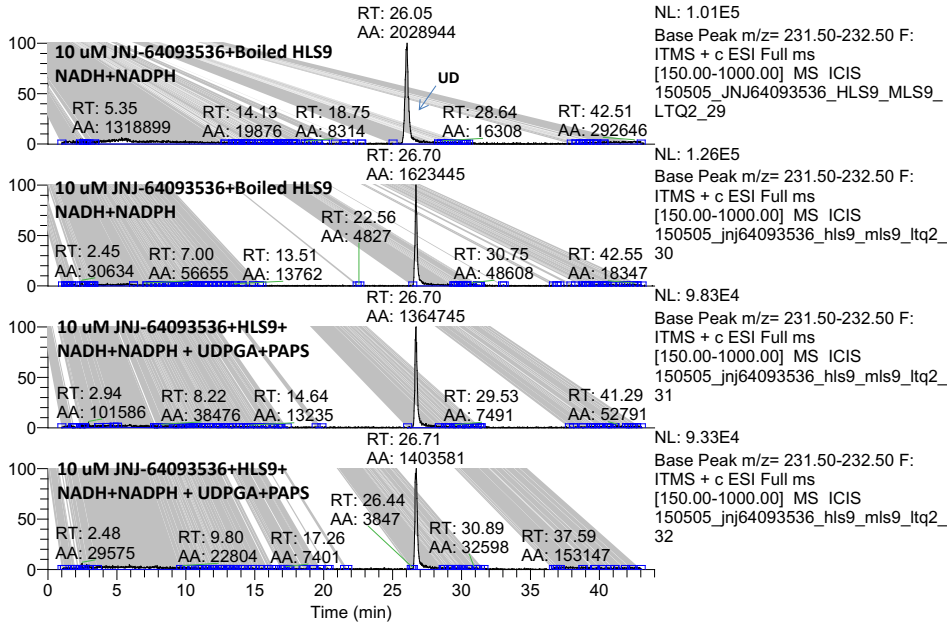

Avg Turnover : 24.2%

B.

RT: 0.00 - 44.01

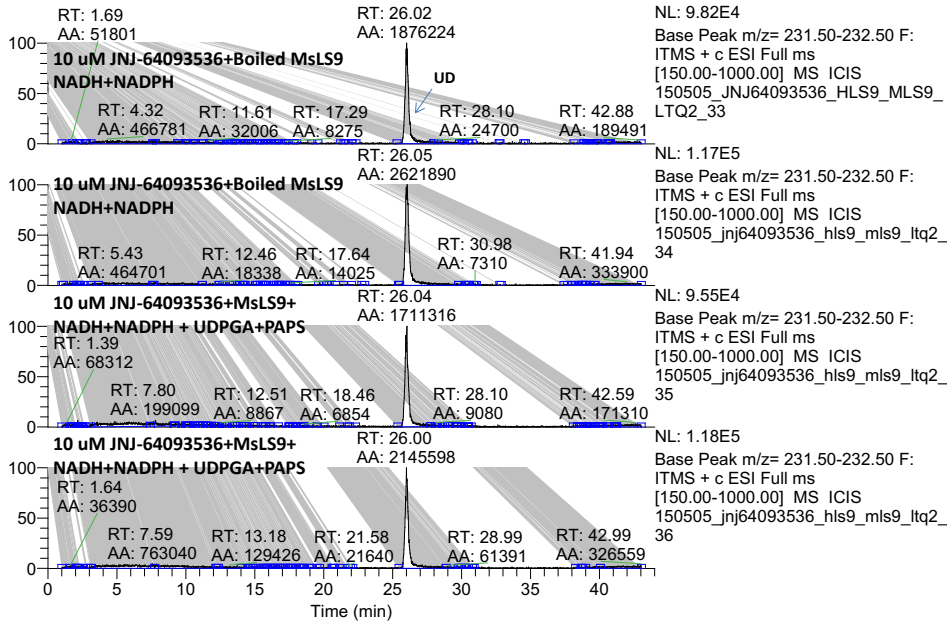

Avg Turnover : 14.3%

**Fig. S2.** Reconstructed ion chromatograms displaying the unchanged drug (UD) in (A) human and (B) mouse liver S9 fractions following 1 hour incubation of 10  $\mu$ M of ELP-004 with boiled liver S9 (top 2) or fortified with NADPH, NADH, UDPGA, DTT, PAPS (bottom 2).

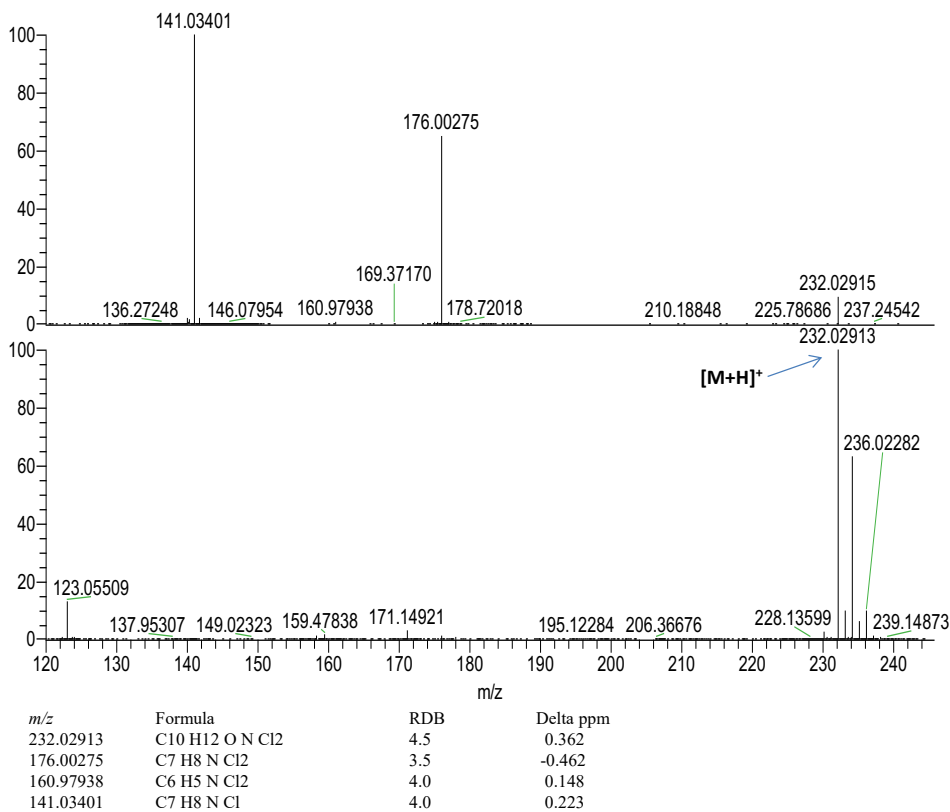

NL: 4.77E5  
 150429inj64093536\_hls9\_mls9\_or  
 bi2\_am\_03#1121-1132 RT:  
 26.78-26.99 AV: 6 F: FTMS + c  
 ESI d Full ms2 232.00@hcd60.00  
 [50.00-245.00]

NL: 2.36E6  
 150429inj64093536\_hls9\_mls9\_or  
 bi2\_am\_03#1122-1132 RT:  
 26.81-26.97 AV: 5 F: FTMS + c  
 ESI Full ms [120.00-1000.00]

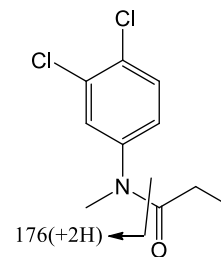

**Fig. S3.** Full scan and product ion mass spectra of ELP-004 from LC-MS/MS analysis of an hour incubation of 10  $\mu$ M of ELP-004 in fortified human liver S9. Top = Product ion spectrum obtained by collision-induced dissociation (CID) of the respective protonated monoisotopic  $MH^+$  species. Bottom = Full scan

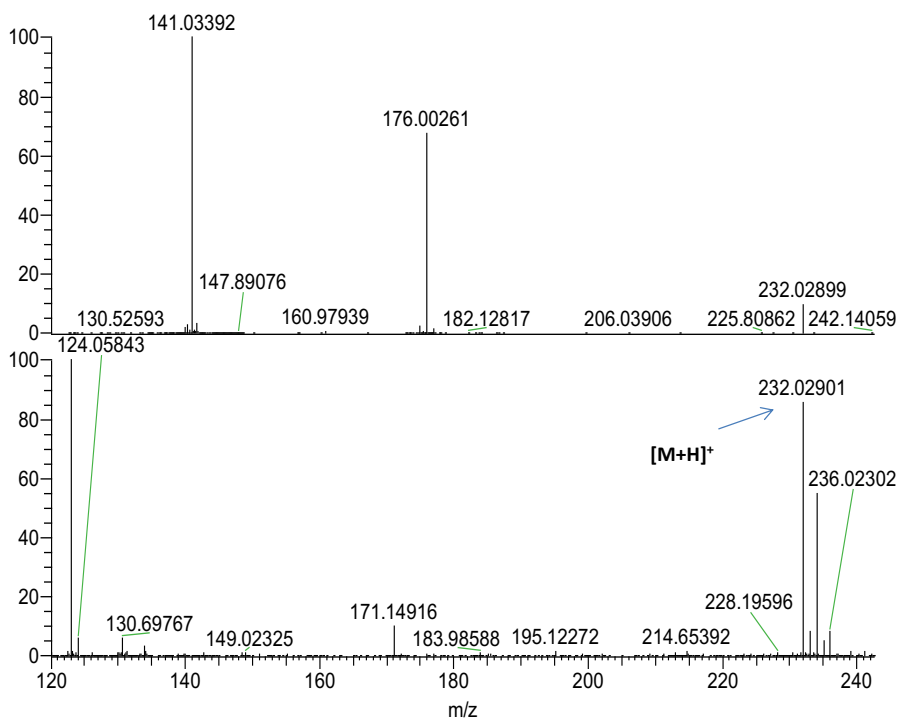

NL: 2.10E5  
 150429JNJ64093536\_HLS9\_MLS  
 9\_Orbi2\_AM\_01#1134-1145 RT:  
 27.38-27.60 AV: 6 F: FTMS + c  
 ESI d Full ms2 232.00@hcd60.00  
 [50.00-245.00]

NL: 7.31E5  
 150429JNJ64093536\_HLS9\_MLS  
 9\_Orbi2\_AM\_01#1132-1151 RT:  
 27.36-27.76 AV: 10 F: FTMS + c  
 ESI Full ms [120.00-1000.00]

| m/z       | Formula         | RDB | Delta ppm |
|-----------|-----------------|-----|-----------|
| 232.02901 | C10 H12 O N Cl2 | 4.5 | -0.155    |
| 176.00261 | C7 H8 N Cl2     | 3.5 | -1.257    |
| 160.97939 | C6 H5 N Cl2     | 4.0 | 0.210     |
| 141.03392 | C7 H8 N Cl      | 4.0 | -0.415    |

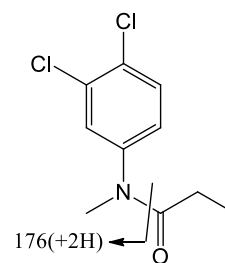

**Fig. S4.** Full scan and product ion mass spectra from LC-MS/MS analysis of ELP-004 standard. Top = Product ion spectrum obtained by collision-induced dissociation (CID) of the respective protonated monoisotopic  $MH^+$  species. Bottom = Full scan

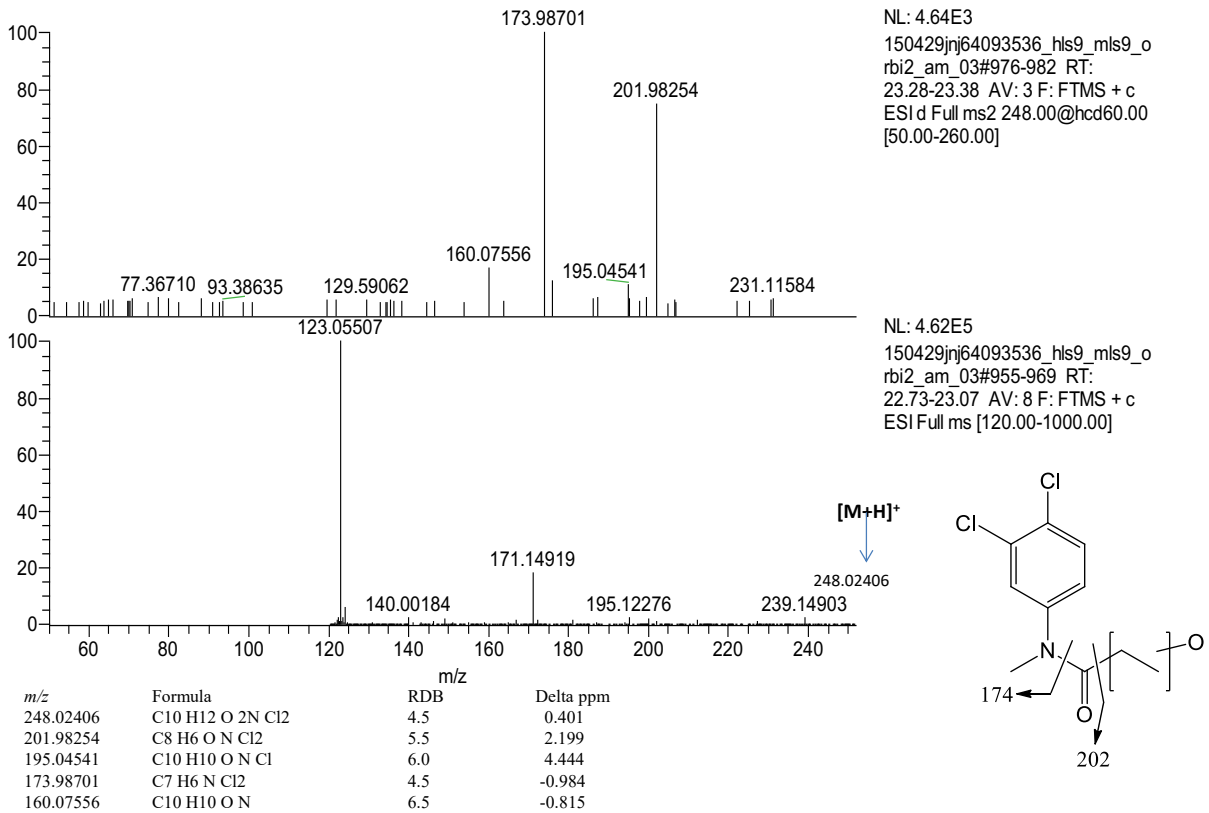

**Fig. S5.** Full scan and product ion mass spectra of M1 (monoxy UD) from LC-MS/MS analysis of an hour incubation of 10  $\mu$ M of ELP-004 in UDPGA, PAPS, NADPH and NADH fortified human liver S9. Top = Product ion spectrum obtained by collision-induced dissociation (CID) of the respective protonated monoisotopic  $MH^+$  species. Bottom = Full scan

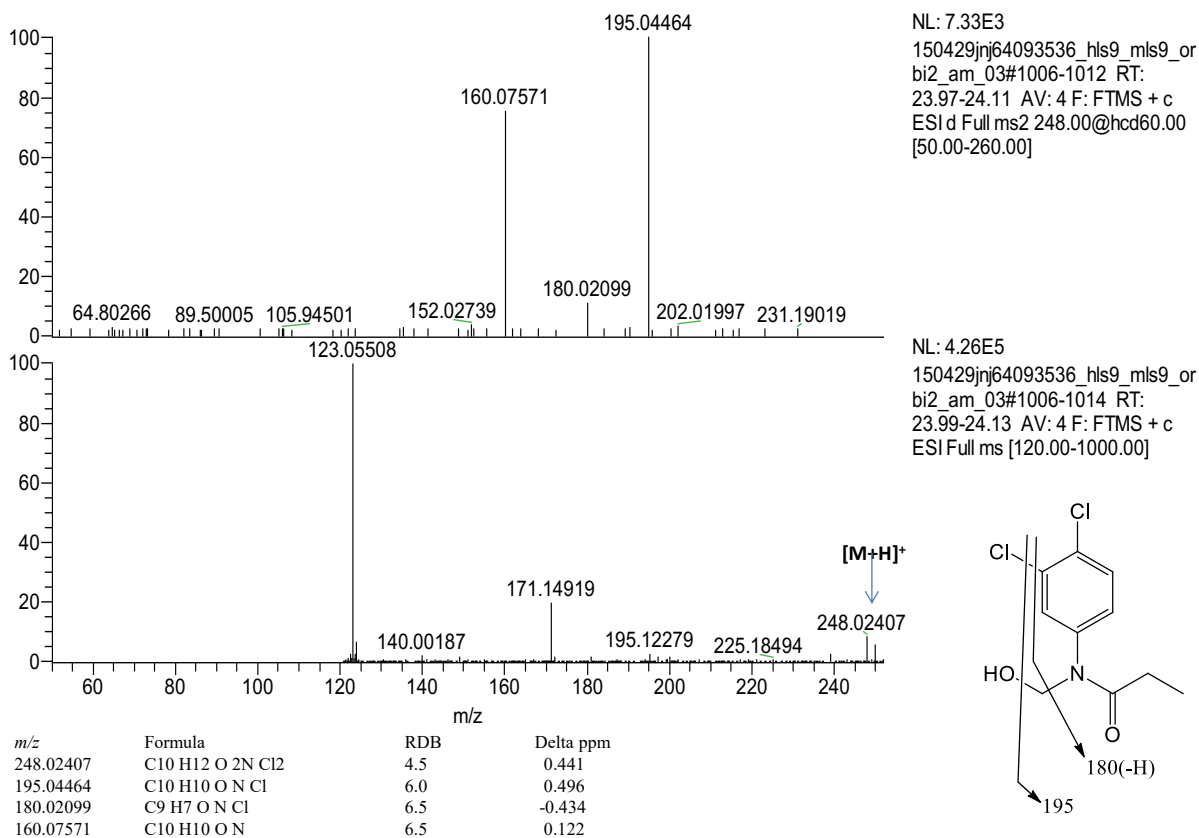

**Fig. S6.** Full scan and product ion mass spectra of M2 (monoxy UD) from LC-MS/MS analysis of an hour incubation of 10  $\mu$ M of ELP-004 in UDPGA, PAPS, NADPH and NADH fortified human liver S9. Top = Product ion spectrum obtained by collision-induced dissociation (CID) of the respective protonated monoisotopic  $MH^+$  species. Bottom = Full scan

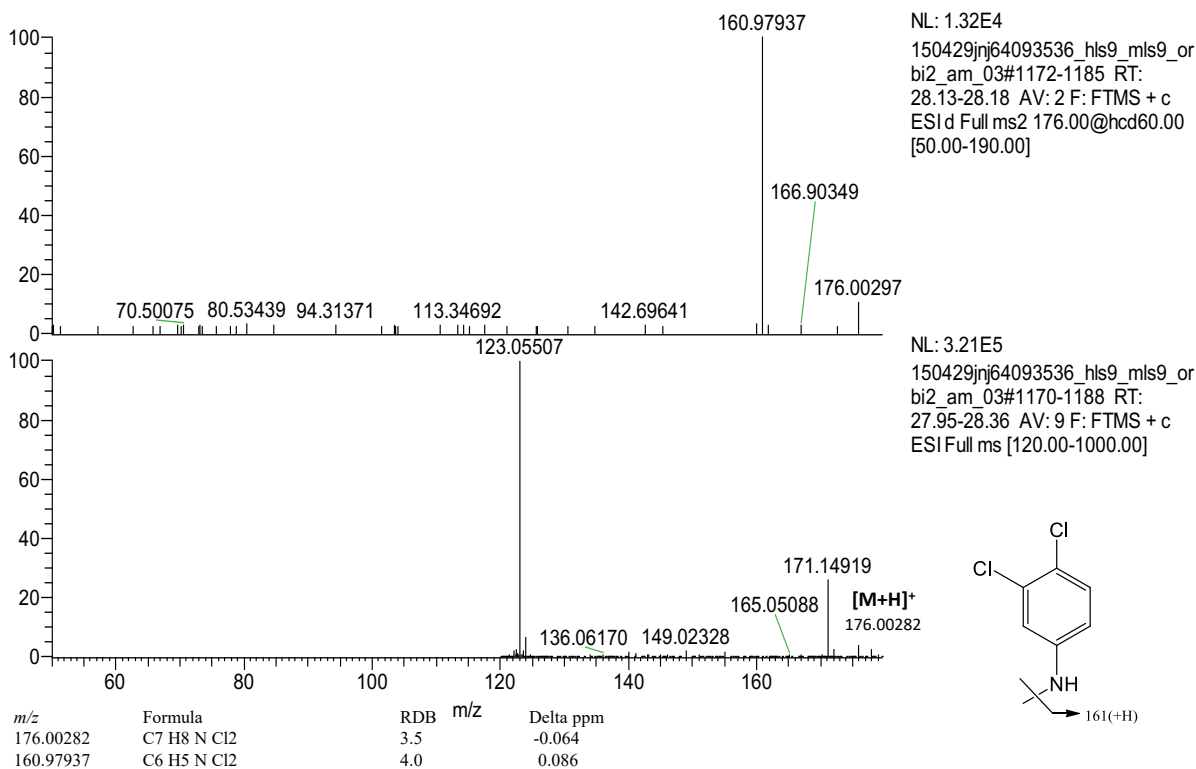

**Fig. S7.** Full scan and product ion mass spectra of M3 (amide hydrolyzed UD) from LC-MS/MS analysis of an hour incubation of 10  $\mu\text{M}$  of ELP-004 in fortified human liver S9. Top = Product ion spectrum obtained by collision-induced dissociation (CID) of the respective protonated monoisotopic  $\text{MH}^+$  species. Bottom = Full scan

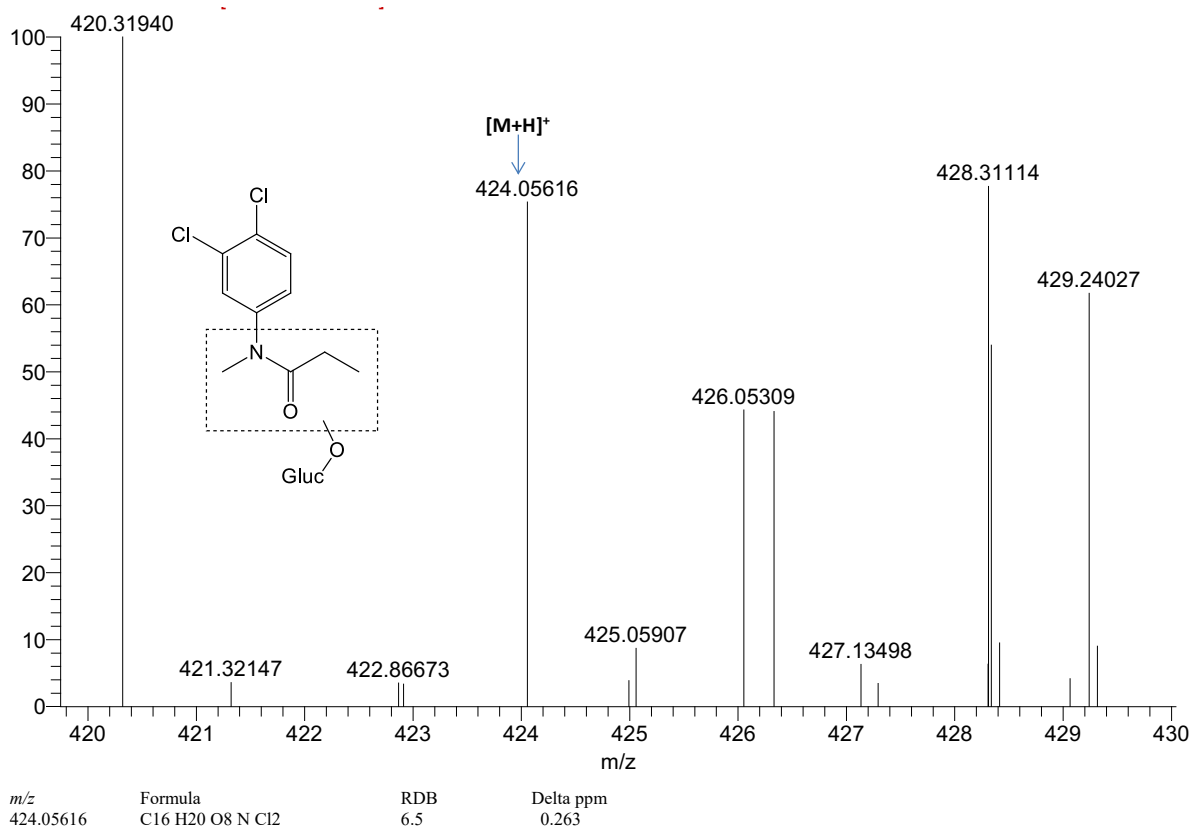

**Fig. S8.** Full scan spectra of M4 (glucuronide of monoxygenated UD) from LC-MS/MS analysis of an hour incubation of 10  $\mu$ M of ELP-004 in UDPGA, PAPS, NADPH and NADH fortified human liver S9



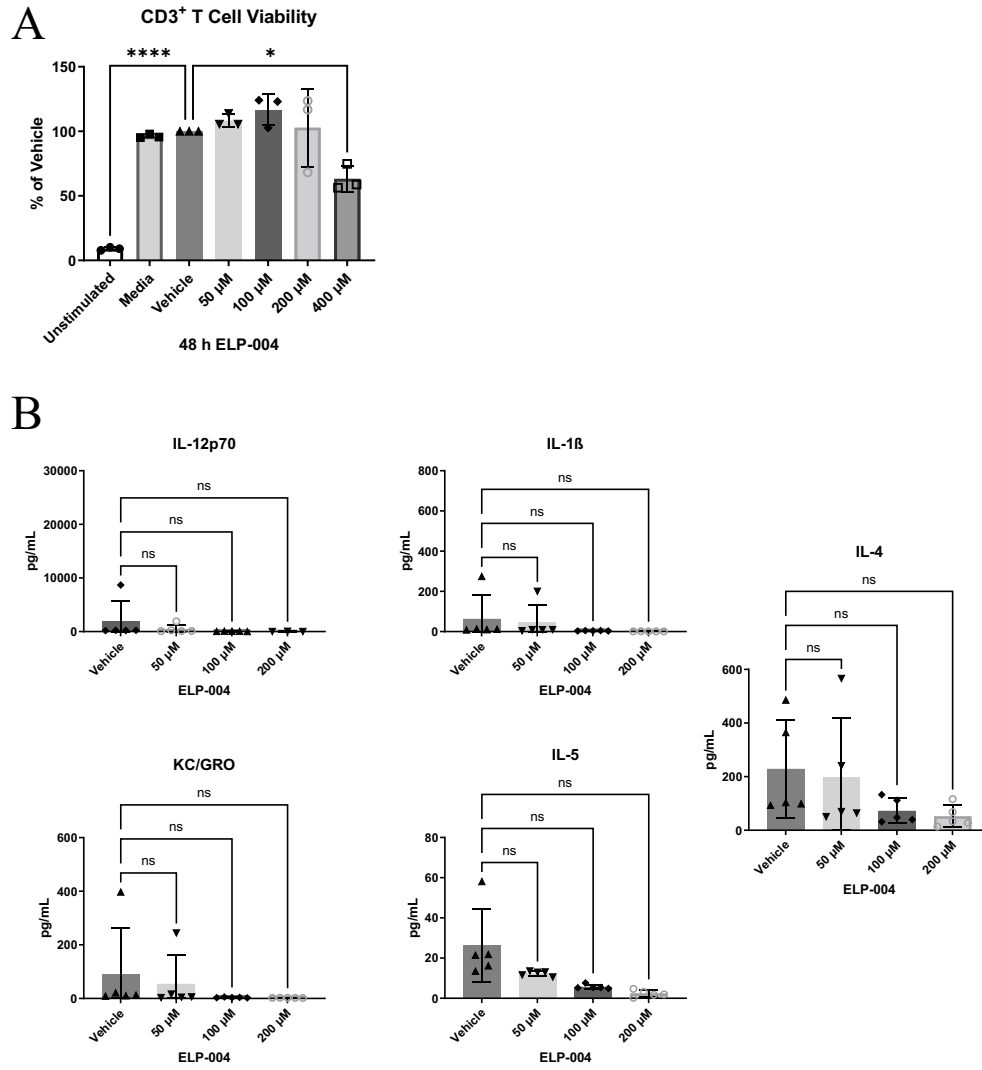

**Fig. S9.** T cells were stimulated *ex vivo* with anti-CD3/CD28 and treated with increasing doses of ELP-004. **(A)** After 48 h, supernatant was collected, remaining cells were stained with anti-CD3 (FITC). Live CD3<sup>+</sup> cells were quantified by flow using PI exclusion. Viability is shown as percentage of vehicle-treated live cells. Groups were compared to vehicle using a one-way ANOVA with a Dunnett's post hoc test for multiple comparisons \*  $p < 0.05$ , \*\*\*\*  $p < 0.0001$ . **(B)** Secreted cytokines were assessed in the supernatant using a multi-analyte ELISA (MSD plate). Cytokine concentrations were compared using repeated measures one-way ANOVA with a Dunnett's post hoc test for multiple comparisons \*  $p < 0.05$ , \*\*  $p < 0.01$ .

### Serum Concentrations

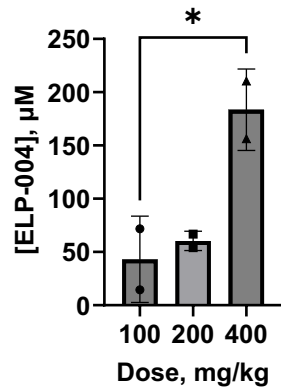

**Fig. S10. Serum concentrations of ELP-004.** ELP-004 was dissolved in 5% DMSO and peanut oil. Male DBA1J (n=2 per group) were administered a single, high dose (100 mg/kg, 200 mg/kg, or 400 mg/kg) of ELP-004 via i.p. injection. Serum was isolated from cardiac blood after 1 hour and ELP-004 concentrations were quantified by mass spectrometry.

**Table S1.** cDNA-expressed human P450 enzyme preparations from baculovirus-infected insect cells

| <b>Isoform</b> | <b>Source</b> | <b>Supplier</b> | <b>Batch</b> |
|----------------|---------------|-----------------|--------------|
| CYP1A1         | Supersomes™   | Corning         | 2081004      |
| CYP2B6         | Supersomes™   | Corning         | 2125161      |
| CYP2C8         | Supersomes™   | Corning         | 8080001      |
| CYP2C9         | Supersomes™   | Corning         | 1306003      |
| CYP2C19        | Supersomes™   | Corning         | 1055002      |
| CYP2D6         | Supersomes™   | Corning         | 9140003      |
| CYP3A4         | Supersomes™   | Corning         | 1349003      |

**Table S2.** CYP Phenotyping Conditions

| <b>Isoform</b> | <b>Protein conc (pMol/mL)</b> | <b>Control compound</b> | <b>Control compound conc (μM)</b> |
|----------------|-------------------------------|-------------------------|-----------------------------------|
| CYP1A2         | 25                            | Ethoxycoumarin          | 1                                 |
| CYP2B6         | 100                           | Efavirenz               | 1                                 |
| CYP2C8         | 25                            | Amodiaquine             | 1                                 |
| CYP2C9         | 25                            | Diclofenac              | 1                                 |
| CYP2C19        | 25                            | Omeprazole              | 1                                 |
| CYP2D6         | 25                            | Dextromethorphan        | 1                                 |
| CYP3A4         | 25                            | Midazolam               | 1                                 |

**Table S3.** Incubation conditions for CYP Inhibition Assays

| <b>Isoform</b> | <b>Probe Substrate</b>        | <b>Protein Conc (mg/mL)</b> | <b>Incubation Time (min)</b> | <b>Positive Control Inhibitor</b>     |
|----------------|-------------------------------|-----------------------------|------------------------------|---------------------------------------|
| CYP1A2         | Tacrine<br>5 $\mu$ M          | 0.25                        | 5                            | alpha-naphthoflavone<br>(0-1 $\mu$ M) |
| CYP2B6         | Bupropion<br>100 $\mu$ M      | 0.25                        | 10                           | Ticlopidine<br>(0-50 $\mu$ M)         |
| CYP2C8         | Amodiaquine<br>5 $\mu$ M      | 0.25                        | 10                           | Quercetin<br>(0-50 $\mu$ M)           |
| CYP2C9         | Tolbutamide<br>100 $\mu$ M    | 0.5                         | 5                            | Sulphaphenazole<br>(0-10 $\mu$ M)     |
| CYP2C19        | Mephenytoin<br>100 $\mu$ M    | 0.25                        | 60                           | Ticlopidine<br>(0-50 $\mu$ M)         |
| CYP2D6         | Dextromethorphan<br>5 $\mu$ M | 0.5                         | 10                           | Quinidine<br>(0-10 $\mu$ M)           |
| CYP3A4         | Midazolam<br>2.5 $\mu$ M      | 0.25                        | 10                           | Ketoconazole<br>(0-10 $\mu$ M)        |
| CYP3A4         | Testosterone<br>50 $\mu$ M    | 0.25                        | 10                           | Ketoconazole<br>(0-10 $\mu$ M)        |

**Table S4.** LC-MS/MS Conditions for CYP Analyses

## LC Gradient

Column: Acquity™ C18 Reverse Phase UPLC HSS T3 (1.8 µm) 2.1 x 50 mm column  
Column Temp.: 50 °C  
Injection Vol.: 10 µL  
Mobile Phase A: 0.1 % v/v formic acid in water  
Mobile Phase B: 0.1 % v/v formic acid in acetonitrile  
Gradient Profile:

| Time (min) | Flow Rate (µL/min) | % Mobile Phase A | % Mobile Phase B |
|------------|--------------------|------------------|------------------|
| 0.10       | 1000               | 98               | 2                |
| 0.35       | 1000               | 5                | 95               |
| 0.70       | 1000               | 5                | 95               |
| 0.80       | 1000               | 98               | 2                |
| 0.90       | 1000               | 98               | 2                |

## MS Optimization data for ELP-004

| Sought Mass (amu) | Optimized Mass (amu) | Parent Daughter Transition | Declustering Potential (V) | Collision Energy (V) | Ionization Mode |
|-------------------|----------------------|----------------------------|----------------------------|----------------------|-----------------|
| 232.11            | 232.00               | 232.00 > 141.00            | 120                        | 35                   | ESI+            |

**Table S5.** LC gradient for chromatographic separation of ELP-004 and its metabolites (Flow Rate: 200  $\mu$ L/min)

| Time (min) | B% |
|------------|----|
| 0          | 5  |
| 2          | 5  |
| 4          | 6  |
| 6          | 8  |
| 8          | 11 |
| 10         | 14 |
| 12         | 18 |
| 14         | 23 |
| 16         | 29 |
| 18         | 35 |
| 20         | 42 |
| 22         | 50 |
| 24         | 60 |
| 26         | 70 |
| 28         | 80 |
| 30         | 95 |
| 35         | 95 |
| 35.1       | 5  |
| 45         | 5  |

Column: BETASIL PhenylHexyl (150 x 2.1 mm i.d., 3.0  $\mu$ m); ThermoScientific, Inc  
LC gradient: A - 10 mM ammonium acetate; B - acetonitrile

**Table S6.** Individual data points shown in Fig. 1B and quantified in Table 1.

| <b>i.v. administration</b> |        | <b>2 mg/kg</b> |        |         |         |         |  |
|----------------------------|--------|----------------|--------|---------|---------|---------|--|
|                            |        | Conc (ng/mL)   |        |         |         |         |  |
| Time (h)                   | Mouse7 | Mouse8         | Mouse9 | Mouse10 | Mouse11 | Mouse12 |  |
| 0.083                      | 771    | 846            | 866    |         |         |         |  |
| 0.25                       |        |                |        | 366     | 437     | 330     |  |
| 0.5                        | 148    | 214            | 184    |         |         |         |  |
| 1                          |        |                |        | 49.4    | 138     | 62.2    |  |
| 2                          | 23.4   | 19.3           | 22.4   |         |         |         |  |
| 4                          |        |                |        | BQL     | BQL     | BQL     |  |
| 7                          | BQL    | BQL            | BQL    |         |         |         |  |
| 24                         | BQL    | BQL            | BQL    | BQL     | BQL     | BQL     |  |

| <b>p.o. administration</b> |        | <b>10 mg/kg</b> |        |        |        |        |  |
|----------------------------|--------|-----------------|--------|--------|--------|--------|--|
|                            |        | Conc (ng/mL)    |        |        |        |        |  |
| Time (h)                   | Mouse1 | Mouse2          | Mouse3 | Mouse4 | Mouse5 | Mouse6 |  |
| 0.25                       | 250    | 257             | 125    |        |        |        |  |
| 0.5                        |        |                 |        | 131    | 215    | 219    |  |
| 1                          | 62.8   | 57.4            | 61.4   |        |        |        |  |
| 2                          |        |                 |        | 44.6   | 26.2   | 24.6   |  |
| 4                          | BQL    | 10.4            | BQL    |        |        |        |  |
| 7                          |        |                 |        | BQL    | BQL    | BQL    |  |
| 24                         | BQL    | BQL             | BQL    | BQL    | BQL    | BQL    |  |

\*value is based on single value only

| <b>s.c. administration</b> |         | <b>2 mg/kg</b> |         |         |         |         |  |
|----------------------------|---------|----------------|---------|---------|---------|---------|--|
|                            |         | Conc (ng/mL)   |         |         |         |         |  |
| Time (h)                   | Mouse13 | Mouse14        | Mouse15 | Mouse16 | Mouse17 | Mouse18 |  |
| 0.083                      | 370     | 404            | 246     |         |         |         |  |
| 0.25                       |         |                |         | 500     | BQL     | 422     |  |
| 0.5                        | 285     | 261            | 209     |         |         |         |  |
| 1                          |         |                |         | 147     | 14.6    | 89.2    |  |
| 2                          | 18.1    | 20.7           | 29.6    |         |         |         |  |
| 4                          |         |                |         | BQL     | BQL     | BQL     |  |
| 7                          | BQL     | BQL            | BQL     |         |         |         |  |
| 24                         | BQL     | BQL            | BQL     | BQL     | BQL     | BQL     |  |

NA - Not available

BQL - Below limit of quantitation

LOQ (ng/mL) 2

**Table S7.** Off-target pharmacological profiling of ELP-004 [10  $\mu$ M] – Targets with <10% inhibition detected.

| Assays                                                                       | Concentration (M) | Reference Compound      |
|------------------------------------------------------------------------------|-------------------|-------------------------|
| A2A (h) (agonist radioligand)                                                | 1.0E-05           | NECA                    |
| A3 (h) (agonist radioligand)                                                 | 1.0E-05           | IB-MECA                 |
| alpha 1 (non-selective) (antagonist radioligand)                             | 1.0E-05           | prazosin                |
| alpha 2 (non-selective) (antagonist radioligand)                             | 1.0E-05           | yohimbine               |
| beta 1 (h) (agonist radioligand)                                             | 1.0E-05           | atenolol                |
| AT1 (h) (antagonist radioligand)                                             | 1.0E-05           | saralasin               |
| BZD (central) (agonist radioligand)                                          | 1.0E-05           | diazepam                |
| B2 (h) (agonist radioligand)                                                 | 1.0E-05           | NPC 567                 |
| D1 (h) (antagonist radioligand)                                              | 1.0E-05           | SCH 23390               |
| D2S (h) (antagonist radioligand)                                             | 1.0E-05           | (+)butaclamol           |
| ETA (h) (agonist radioligand)                                                | 1.0E-05           | endothelin-1            |
| GABA (non-selective) (agonist radioligand)                                   | 1.0E-05           | GABA                    |
| GAL2 (h) (agonist radioligand)                                               | 1.0E-05           | galanin                 |
| CXCR2 (IL-8B) (h) (agonist radioligand)                                      | 1.0E-05           | IL-8                    |
| H1 (h) (antagonist radioligand)                                              | 1.0E-05           | pyrilamine              |
| H2 (h) (antagonist radioligand)                                              | 1.0E-05           | cimetidine              |
| MC4 (h) (agonist radioligand)                                                | 1.0E-05           | NDP-alpha -MSH          |
| M1 (h) (antagonist radioligand)                                              | 1.0E-05           | pirenzepine             |
| M2 (h) (antagonist radioligand)                                              | 1.0E-05           | methoctramine           |
| M3 (h) (antagonist radioligand)                                              | 1.0E-05           | 4-DAMP                  |
| NK2 (h) (agonist radioligand)                                                | 1.0E-05           | [Nleu10]-NKA (4-10)     |
| NK3 (h) (antagonist radioligand)                                             | 1.0E-05           | SB 222200               |
| Y1 (h) (agonist radioligand)                                                 | 1.0E-05           | NPY                     |
| Y2 (h) (agonist radioligand)                                                 | 1.0E-05           | NPY                     |
| NTS1 (NT1) (h) (agonist radioligand)                                         | 1.0E-05           | neurotensin             |
| delta 2 (DOP) (h) (agonist radioligand)                                      | 1.0E-05           | DPDPE                   |
| mu (MOP) (h) (agonist radioligand)                                           | 1.0E-05           | DAMGO                   |
| NOP (ORL1) (h) (agonist radioligand)                                         | 1.0E-05           | nociceptin              |
| 5-HT1B (antagonist radioligand)                                              | 1.0E-05           | serotonin               |
| 5-HT2A (h) (antagonist radioligand)                                          | 1.0E-05           | ketanserin              |
| 5-HT5a (h) (agonist radioligand)                                             | 1.0E-05           | serotonin               |
| 5-HT6 (h) (agonist radioligand)                                              | 1.0E-05           | serotonin               |
| 5-HT7 (h) (agonist radioligand)                                              | 1.0E-05           | serotonin               |
| sst (non-selective) (agonist radioligand)                                    | 1.0E-05           | somatostatin-14         |
| VPAC1 (VIP1) (h) (agonist radioligand)                                       | 1.0E-05           | VIP                     |
| V1a (h) (agonist radioligand)                                                | 1.0E-05           | [d(CH2)51,Tyr(Me)2]-AVP |
| Ca2+ channel (L, verapamil site) (phenylalkylamine) (antagonist radioligand) | 1.0E-05           | D 600                   |
| KV channel (antagonist radioligand)                                          | 1.0E-05           | alpha -dendrotoxin      |
| SKCa channel (antagonist radioligand)                                        | 1.0E-05           | apamin                  |
| Na+ channel (site 2) (antagonist radioligand)                                | 1.0E-05           | veratridine             |
| Cl- channel (GABA-gated) (antagonist radioligand)                            | 1.0E-05           | picrotoxinin            |
| norepinephrine transporter (h) (antagonist radioligand)                      | 1.0E-05           | protriptyline           |
| 5-HT transporter (h) (antagonist radioligand)                                | 1.0E-05           | imipramine              |
